# Supplementary material for: Gut bacteria-derived 5-hydroxyindole is a potent stimulant of intestinal motility via its action on L-type calcium channels
Source: PLoS Biol. 2021 Jan 22;19(1):e3001070. doi: 10.1371/journal.pbio.3001070 (PMC7857600; doi:10.1371/journal.pbio.3001070)
Supplement: S4 Data — (XLSX) [file pbio.3001070.s009.xlsx]

## Sheet: Fig_5A
100 µM 5-HI	Control		Unpaired t test
438.047	133.438
446.042	206.881
526.97	162.95
496.522	154.853
493.562	133.75
502.01	142.731

## Sheet: Fig_5B
Baseline	100 µM 5-HI		Wilcoxon test
0.00808	0.01082
0.0076	0.02229
0.00291	0.004
0.00268	0.00506
0.01481	0.04227
0.02242	0.03933
0.02833	0.04014
0.01319	0.01505

## Sheet: Fig_5C
Concentration (µM)	5-HI response
0.3	0	0	0
1	0.00103	0.00173	0.00033
3	0.00216	0.00208	-0.00324
10	0.00529	0.00992	0.00218
30	0.012	0.02054	0.00452
100	0.01432	0.02678	0.0197

## Sheet: Fig_5D
10 µM 5-HT	10 µM 5-HT + 100 µM 5-HI		Wilcoxon test
0.0023	0.0166
0.0009	0.01055
0.0117	0.0122
0.0003	0.0125
0.0034	-0.0036
-0.00048	0.00146
-0.00103	0.00142
0.00167	-0.00094
-0.00052	0.00034
-0.00142	0.00052
0.00109	0.00097
0.0086	0.0033
0.00059	0.00117
0.01784	0.0027
-0.00172	0.00163
0.00058	0.00041
-0.0086	0.0089
-0.00134	0.00374
0.00099	0.00505
0.0022	0.0012
0.00081	0.00102
0.004	-0.0026
0.00187	0.001
-0.00053	0.00224
-0.00028	0.00667
-0.0103	0.0083
0.00817	-0.0022
0.0095	-0.0006
0.0009	0.00868
-0.00092	0.00275
-0.0087	0.0091
0.00136	0.00482
0.0016	0.0051
0.00011	0.00634
-0.00012	0.00239

## Sheet: Fig_5E
1 µM ondansetron	1 µM ondansetron + 100 µM 5-HI		Wilcoxon test
0.0116	-0.0013
-0.0102	0.0206
0.0052	0.0003
0.0013	-0.0009
0.00093	0.00113
-0.0021	-0.0071
0.0011	0.0051
0.0085	0.00532

## Sheet: Fig_5F
100 µM 5-HI	1 µM SB-207266 + 100 µM 5-HI		Wilcoxon test
-0.0026	-0.00193
0.0011	0.00429
0.00149	0.00134
0.00868	0.00238
0.0079	0.0118

## Sheet: Fig_5G
100 µM 5-HI	1 µM TTX + 100 µM 5-HI		Wilcoxon test
0.0018	0.0097
-0.00079	-0.00034
0.00063	0.00119
-0.00061	0.00053
0.00442	0.00429
0.00761	0.00436
0.00045	0.00171
0.00565	0.00218
0.01863	0.00903
0.00613	0.0025

## Sheet: Fig_5H
50 µM Ach	50 µM Ach + 100 µM 5-HI		Wilcoxon test
0.0034	0.0039
-0.0078	0.0146
-0.0004	0.0044
-0.00023	0.00193
0.02986	-0.0184
-0.0026	0.0387
-0.00476	0.01156
0.00171	0.00382
-0.00039	0.00513
-0.00074	0.00303
0.0328	0.0561
0.0046	0.0437
-0.001	0.02
-0.00297	0.00543
4e-05	0.00149
-0.00692	0.00572
-0.003	0.0153
-0.0015	0.00384

## Sheet: Fig_5I
100 µM 5-HI	100 nM DAU 5884 hydrochloride + 100 µM 5-HI		Wilcoxon test
0.0133	0.0826
-0.00198	0.0339
-0.00141	0.00311
0.00063	0.00196
0.0094	0.0455
0.0033	0.0083

## Sheet: Fig_5J
100 µM 5-HI	1 µM AQ-RA 741 + 100 µM 5-HI		Wilcoxon test
0.0561	0.0753
0.00741	0.00385
0.00323	0.00115
0.00127	0.00089
0.0225	0.0104
0.00237	0.00236

[truncated: 1 more sheets: Fig_5K]
